# Supplementary material for: Photolytic mechanisms of hydroxylamine
Source: Royal Society of Chemistry journal article supplement (doi:10.1039/c9ra10956k), 2020-01-01
Supplement: c9ra10956k1.pdf [file c9ra10956k1.pdf]

***Electronic Supplementary Information (ESI)***

***Photolytic mechanisms of hydroxylamine***

by

Jittima Thisuwan

*Division of Science Education*

*Faculty of Education*

*Nakhon Phanom University,*

*Nakhon Phanom 48000,*

*Thailand*

Phorntep Promma

and

Kritsana Sagarik\*

*School of Chemistry*

*Institute of Science*

*Suranaree University of Technology*

*Nakhon Ratchasima 30000*

*Thailand*

**Figure S1** a) Schematic diagram showing doubly occupied and active spaces used in CASPT2(10,9) calculations.

b)-c) Spatial distributions of the orbitals potentially involved in  $S_0 \rightarrow S_1$  excitation of  $\text{NH}_2\text{OH}$ .

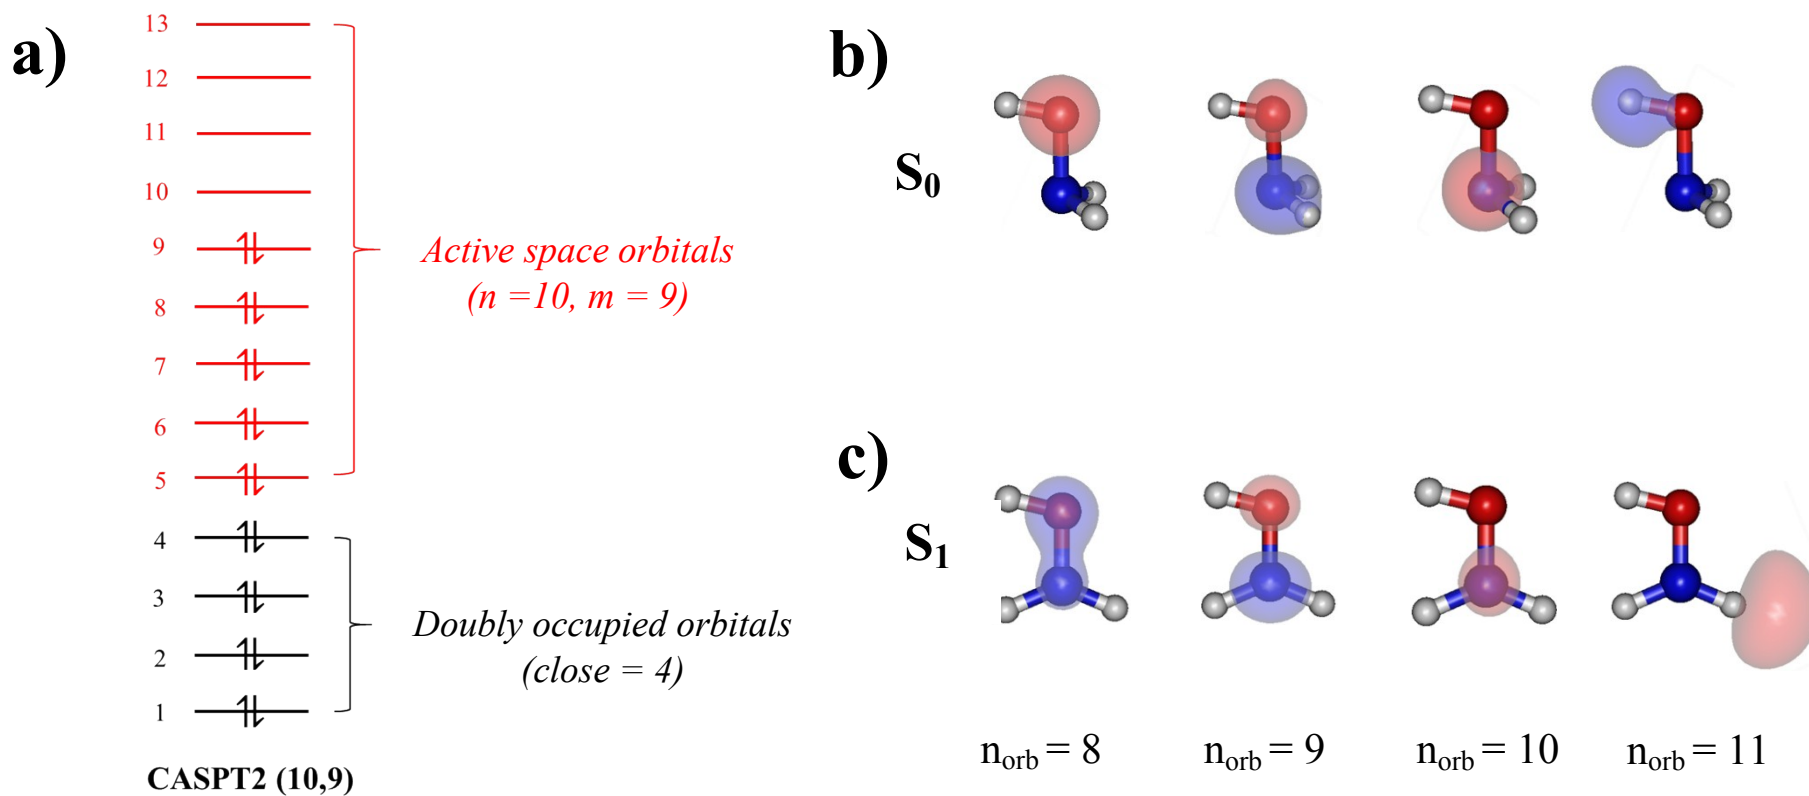

**Figure S2** a) Linear relationship between  $\ln k^{Q\text{-vib}}$  and  $1/T$  used in the calculations of the enthalpy of activation ( $\Delta H^\ddagger$ ) for formation of the precursor in the  $S_0$  state (structure **G1-[2]<sup>‡</sup>** in channel (1)).

b) Linear relationship between  $\Delta G^{\text{Rel}}$  and  $T$  used in the calculation of the enthalpy of the exothermic process ( $\Delta H^{\text{Rel}}$ ) in the  $S_1$  state (**E1-[1]<sup>\*</sup> → E1-[3]<sup>§</sup>**).

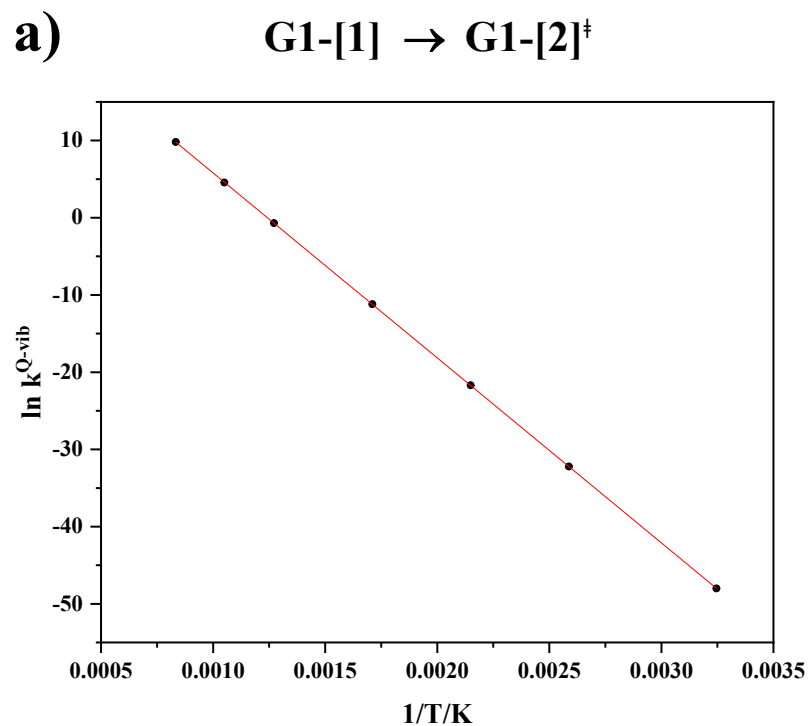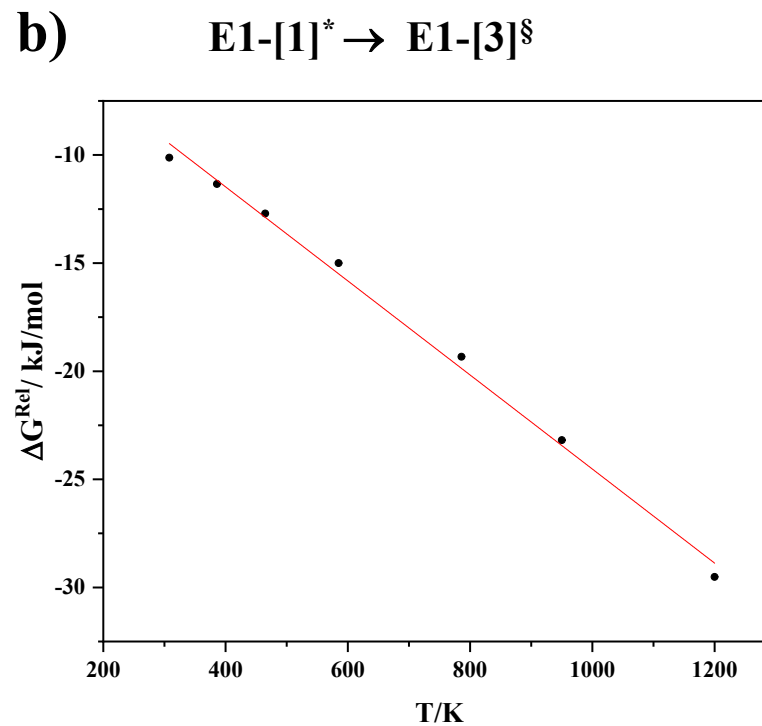

**Figure S2a-b**

**Table S1** Characteristic structures on the  $S_1$  potential energy curve for the O–H dissociation in channel (1). The electronic states and the CI coefficients were

| Structures                                                                                            | $S_0$                      |           | $S_1$                                 |           |
|-------------------------------------------------------------------------------------------------------|----------------------------|-----------|---------------------------------------|-----------|
|                                                                                                       | Conf.                      | CI Coeff. | Conf.                                 | CI Coeff. |
| E1-[1] 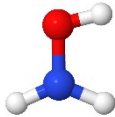              | $\Psi_0$                   | 0.9789    | $\Psi_9^{\bar{1}0}$                   | 0.9715    |
|                                                                                                       | $\Psi_{8,8}^{11,\bar{1}1}$ | 0.0764    | $\Psi_{9,8,8}^{\bar{1}0,11,\bar{1}1}$ | 0.0694    |
|                      | $\Psi_0$                   | 0.9730    | $\Psi_9^{\bar{1}0}$                   | 0.9659    |
|                                                                                                       | $\Psi_8^{\bar{1}0}$        | 0.0649    | $\Psi_{9,8}^{10,\bar{1}0}$            | 0.0844    |
| E1-[3] <sup>§</sup>  | $\Psi_0$                   | 0.9294    | $\Psi_9^{\bar{1}0}$                   | 0.9463    |
|                                                                                                       | $\Psi_8^{\bar{1}0}$        | 0.2293    | $\Psi_{9,8}^{10,\bar{1}0}$            | 0.2441    |
|                                                                                                       | $\Psi_{8,8}^{10,\bar{1}0}$ | 0.2191    | -                                     | -         |

obtained from CASPT2(10,9) calculations.

E1-[2]<sup>†</sup>

**Table S2** Characteristic structures on the  $S_1$  potential energy curve for the N–O dissociation in channel (2). The electronic states and the CI coefficients were obtained from CASPT2(10,9) calculations.

| Structures                                                                                            | S <sub>0</sub>             |           | S <sub>1</sub>                        |           |
|-------------------------------------------------------------------------------------------------------|----------------------------|-----------|---------------------------------------|-----------|
|                                                                                                       | Conf.                      | CI Coeff. | Conf.                                 | CI Coeff. |
| E2-[1] 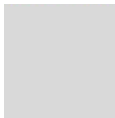              | $\Psi_0$                   | 0.9518    | $\Psi_9^{\bar{1}0}$                   | 0.9453    |
|                                                                                                       | $\Psi_{8,8}^{\bar{1}0,10}$ | 0.1177    | $\Psi_{9,8}^{10,\bar{1}1}$            | 0.1591    |
|                                                                                                       | -                          | -         | $\Psi_{9,8,8}^{\bar{1}0,11,\bar{1}1}$ | 0.0939    |
| E2-[2]*              | $\Psi_0$                   | 0.9700    | $\Psi_9^{\bar{1}0}$                   | 0.9590    |
|                                                                                                       | $\Psi_{8,8}^{11,\bar{1}1}$ | 0.1348    | $\Psi_{9,8,8}^{\bar{1}0,11,\bar{1}1}$ | 0.1202    |
| E2-[3] <sup>§</sup>  | $\Psi_0$                   | 0.8839    | $\Psi_9^{\bar{1}0}$                   | 0.9312    |
|                                                                                                       | $\Psi_8^{\bar{1}0}$        | 0.3061    | $\Psi_{9,8}^{10,\bar{1}0}$            | 0.2852    |
|                                                                                                       | $\Psi_{8,8}^{10,\bar{1}0}$ | 0.2684    | -                                     | -         |

**Table S3** Characteristic structures on the S<sub>1</sub> potential energy curve for the N–H<sup>cis</sup> dissociation in channel (3). The electronic states and the CI coefficients were

| Structures                                                                                              | S <sub>0</sub>             |           | S <sub>1</sub>                        |           |
|---------------------------------------------------------------------------------------------------------|----------------------------|-----------|---------------------------------------|-----------|
|                                                                                                         | Conf.                      | CI Coeff. | Conf.                                 | CI Coeff. |
| E3-[1] 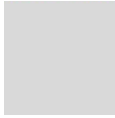              | $\Psi_0$                   | 0.9807    | $\Psi_9^{\bar{1}0}$                   | 0.9733    |
|                                                                                                         | $\Psi_{8,8}^{11,\bar{1}1}$ | 0.0871    | $\Psi_{9,8,8}^{\bar{1}0,11,\bar{1}1}$ | 0.0790    |
|                      | $\Psi_0$                   | 0.9740    | $\Psi_9^{\bar{1}0}$                   | 0.9669    |
|                                                                                                         | $\Psi_8^{\bar{1}0}$        | 0.0641    | $\Psi_{9,8}^{10,\bar{1}0}$            | 0.0843    |
| E3-[3] <sup>§</sup>  | $\Psi_0$                   | 0.9438    | $\Psi_9^{\bar{1}0}$                   | 0.9483    |
|                                                                                                         | $\Psi_8^{\bar{1}0}$        | 0.1943    | $\Psi_{9,8}^{10,\bar{1}0}$            | 0.2240    |
|                                                                                                         | $\Psi_{8,8}^{10,\bar{1}0}$ | 0.1637    | -                                     | -         |

obtained from CASPT2(10,9) calculations.

E3-[2]\*

**Table S4** Characteristic structures on the  $S_1$  potential energy curve for the N–H<sup>trans</sup> dissociation in channel (4). The electronic states and the CI coefficients were

| Structures                                                                                  | $S_0$                                  |           | $S_1$                                  |           |
|---------------------------------------------------------------------------------------------|----------------------------------------|-----------|----------------------------------------|-----------|
|                                                                                             | Conf.                                  | CI Coeff. | Conf.                                  | CI Coeff. |
| E4-[1] 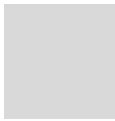  | $\Psi_0$                               | 0.9790    | $\Psi_{\bar{9}}^{\bar{1}0}$            | 0.9716    |
|                                                                                             | $\Psi_{\bar{8},\bar{8}}^{11,\bar{1}1}$ | 0.0764    | $\Psi_{\bar{9},\bar{8}}^{10,\bar{1}0}$ | 0.0753    |
| E4-[2]*  | $\Psi_0$                               | 0.9670    | $\Psi_{\bar{9}}^{\bar{1}0}$            | 0.9587    |
|                                                                                             | $\Psi_{\bar{8},\bar{8}}^{11,\bar{1}1}$ | 0.1033    | $\Psi_{\bar{9},\bar{8}}^{10,\bar{1}0}$ | 0.1317    |
|                                                                                             | $\Psi_{\bar{8},\bar{8}}^{10,\bar{1}0}$ | 0.0871    | -                                      | -         |
| E4-[3]§  | $\Psi_{\bar{9}}^{\bar{1}0}$            | 0.9417    | $\Psi_0$                               | 0.9309    |
|                                                                                             | $\Psi_{\bar{9},\bar{8}}^{10,\bar{1}0}$ | 0.2568    | $\Psi_{\bar{8}}^{\bar{1}0}$            | 0.2330    |
|                                                                                             | -                                      | -         | $\Psi_{\bar{8},\bar{8}}^{10,\bar{1}0}$ | 0.1932    |

obtained from CASPT2(10,9) calculations.

**Table S5** Characteristic structures on the  $S_1$  potential energy curve for the formation  $NH_3O$  in channel (5). The electronic states and the CI coefficients were

| Structures                                                                                                       | $S_0$                                  |           | $S_1$                                             |           |
|------------------------------------------------------------------------------------------------------------------|----------------------------------------|-----------|---------------------------------------------------|-----------|
|                                                                                                                  | Conf.                                  | CI Coeff. | Conf.                                             | CI Coeff. |
| <b>E5-[1]</b><br>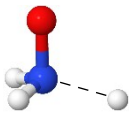             | $\Psi_0$                               | 0.6747    | $\Psi_{\bar{9}}^{\bar{10}}$                       | 0.9306    |
|                                                                                                                  | $\Psi_{\bar{8}}^{\bar{10}}$            | 0.6018    | $\Psi_{\bar{9},\bar{8}}^{10,\bar{10}}$            | 0.2924    |
|                                                                                                                  | $\Psi_{\bar{8},\bar{8}}^{10,\bar{10}}$ | 0.3501    | -                                                 | -         |
| <b>E5-[2]<sup>†</sup></b><br> | $\Psi_0$                               | 0.9514    | $\Psi_{\bar{9}}^{\bar{10}}$                       | 0.9525    |
|                                                                                                                  | $\Psi_{\bar{8}}^{\bar{11}}$            | 0.1352    | $\Psi_{\bar{9},\bar{8}}^{10,\bar{11}}$            | 0.1129    |
|                                                                                                                  | $\Psi_{\bar{8},\bar{8}}^{11,\bar{11}}$ | 0.0952    | $\Psi_{\bar{9},\bar{8},\bar{8}}^{10,11,\bar{11}}$ | 0.1071    |
| <b>E5-[3]</b><br>             | $\Psi_0$                               | 0.9715    | $\Psi_{\bar{9}}^{\bar{10}}$                       | 0.9711    |
|                                                                                                                  | $\Psi_{\bar{8},\bar{8}}^{11,\bar{11}}$ | 0.1018    | $\Psi_{\bar{9},\bar{8},\bar{8}}^{10,11,\bar{11}}$ | 0.1180    |
|                                                                                                                  | $\Psi_{\bar{8}}^{\bar{11}}$            | 0.0783    | -                                                 | -         |

obtained from CASPT2(10,9) calculations.

**Table S6** Characteristic structures on the  $S_1$  potential energy curve for the formation of HNO and  $H_2$  in channel (6). The electronic states and the CI coefficients were obtained from CASPT2(10,9) calculations.



| Structures                                                                                                  | S <sub>0</sub>                         |           | S <sub>1</sub>                                                |           |
|-------------------------------------------------------------------------------------------------------------|----------------------------------------|-----------|---------------------------------------------------------------|-----------|
|                                                                                                             | Conf.                                  | CI Coeff. | Conf.                                                         | CI Coeff. |
| <b>E6-[1]</b> 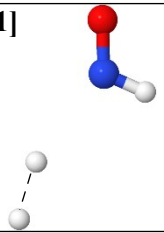             | $\Psi_0$                               | 0.9141    | $\Psi_{\bar{9}}^{\bar{1}0}$                                   | 0.9086    |
|                                                                                                             | $\Psi_{\bar{8},\bar{8}}^{10,\bar{1}0}$ | 0.2000    | $\Psi_{\bar{9},\bar{9}}^{10,\bar{1}1}$                        | 0.2675    |
| <b>E6-[2]<sup>‡</sup></b>  | $\Psi_0$                               | 0.9212    | $\Psi_{\bar{9}}^{\bar{1}0}$                                   | 0.9270    |
|                                                                                                             | $\Psi_{\bar{7}}^{\bar{1}0}$            | 0.0628    | $\Psi_{\bar{9},\bar{8},\bar{8}}^{\bar{1}0,\bar{1}1,\bar{1}1}$ | 0.2569    |
| <b>E6-[3]</b>              | $\Psi_0$                               | 0.9493    | $\Psi_{\bar{9}}^{\bar{1}0}$                                   | 0.9557    |
|                                                                                                             | $\Psi_{\bar{8},\bar{8}}^{10,\bar{1}0}$ | 0.1960    | $\Psi_{\bar{9},\bar{8}}^{10,\bar{1}0}$                        | 0.0772    |
|                                                                                                             | $\Psi_{\bar{8}}^{\bar{1}0}$            | 0.0743    | -                                                             | -         |

**Table S7** Characteristic structures on the S<sub>1</sub> potential energy curve for the formation of NH-H<sub>2</sub>O complex. The electronic states and the CI coefficients were obtained from CASPT2(10,9) calculations.

| Structures                                                                                                  | $S_0$                                                                      |                       | $S_1$                                                                                  |                            |
|-------------------------------------------------------------------------------------------------------------|----------------------------------------------------------------------------|-----------------------|----------------------------------------------------------------------------------------|----------------------------|
|                                                                                                             | Conf.                                                                      | CI Coeff.             | Conf.                                                                                  | CI Coeff.                  |
| <b>E7-[1]</b> 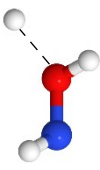             | $\Psi_{\bar{9}}^{\bar{1}0}$<br>$\Psi_{\bar{9},\bar{8}}^{10,\bar{1}0}$<br>- | 0.9310<br>0.2992<br>- | $\Psi_0$<br>$\Psi_{\bar{8}}^{\bar{1}0}$<br>$\Psi_{\bar{8},\bar{8}}^{10,\bar{1}0}$      | 0.6965<br>0.5798<br>0.3567 |
| <b>E7-[2]<sup>§</sup></b>  | $\Psi_0$<br>$\Psi_{\bar{8},\bar{8}}^{\bar{1}1,11}$                         | 0.6858<br>0.1057      | $\Psi_{\bar{9}}^{\bar{1}0}$<br>$\Psi_{\bar{9},\bar{8},\bar{8}}^{\bar{1}0,11,\bar{1}1}$ | 0.9706<br>0.1496           |
| <b>G7-[3]</b>              | $\Psi_0$<br>$\Psi_{\bar{8},\bar{8}}^{\bar{1}1,11}$                         | 0.6956<br>0.0510      | $\Psi_{\bar{9}}^{\bar{1}0}$<br>$\Psi_{\bar{9},\bar{8},\bar{8}}^{\bar{1}0,11,\bar{1}1}$ | 0.9790<br>0.0718           |

**Table S8** Rate constants (k), enthalpies of activation ( $\Delta H^\ddagger$ ) and Gibbs free energy barriers ( $\Delta G^\ddagger$ ) for the formation of the precursors in the direct covalent bond dissociations in the  $S_0$  state, obtained based on transition state theory and the potential energy curves. Energies, rate constants and temperatures are in  $\text{kJ mol}^{-1}$ ,  $\text{s}^{-1}$  and K, respectively.

|                                    | $\Delta E^\ddagger$ | $\Delta H^\ddagger$ | $T_c$ | T    | $k^{\text{Class}}$     | $k^{\text{Q-vib}}$     | $k^{\text{S-Wig}}$     | $\Delta G^\ddagger$ |
|------------------------------------|---------------------|---------------------|-------|------|------------------------|------------------------|------------------------|---------------------|
|                                    |                     |                     |       | 308  | $1.07 \times 10^{-22}$ | $1.42 \times 10^{-21}$ | $4.81 \times 10^{-21}$ | 199                 |
| <b>G1-[1] → G1-[2]<sup>‡</sup></b> | 209                 | 199                 | 371   | 585  | $4.00 \times 10^{-6}$  | $1.38 \times 10^{-5}$  | $2.29 \times 10^{-5}$  | 201                 |
|                                    |                     |                     |       | 1200 | $1.18 \times 10^4$     | $1.82 \times 10^4$     | $2.11 \times 10^4$     | 210                 |
|                                    |                     |                     |       | 308  | $3.42 \times 10^{-19}$ | $8.42 \times 10^{-20}$ | $1.81 \times 10^{-19}$ | 188                 |
| <b>G1-[1] → G2-[2]<sup>‡</sup></b> | 216                 | 190                 | 257   | 585  | $2.53 \times 10^{-5}$  | $1.38 \times 10^{-4}$  | $1.82 \times 10^{-4}$  | 190                 |
|                                    |                     |                     |       | 1200 | $4.46 \times 10^4$     | $7.75 \times 10^4$     | $8.34 \times 10^4$     | 195                 |
|                                    |                     |                     |       | 308  | $3.72 \times 10^{-24}$ | $4.75 \times 10^{-23}$ | $9.21 \times 10^{-23}$ | 207                 |
| <b>G1-[1] → G3-[2]<sup>‡</sup></b> | 222                 | 208                 | 232   | 585  | $7.49 \times 10^{-7}$  | $2.39 \times 10^{-6}$  | $3.01 \times 10^{-6}$  | 209                 |
|                                    |                     |                     |       | 1200 | $5.79 \times 10^3$     | $8.54 \times 10^3$     | $9.07 \times 10^3$     | 217                 |
|                                    |                     |                     |       | 308  | $1.37 \times 10^{-37}$ | $3.00 \times 10^{-35}$ | $8.02 \times 10^{-35}$ | 279                 |
| <b>G1-[1] → G4-[2]<sup>‡</sup></b> | 314                 | 281                 | 310   | 585  | $9.87 \times 10^{-14}$ | $9.87 \times 10^{-13}$ | $1.44 \times 10^{-12}$ | 281                 |
|                                    |                     |                     |       | 1200 | $4.24 \times 10^0$     | $8.82 \times 10^0$     | $9.80 \times 10^0$     | 286                 |

$\Delta E^\ddagger$  = energy barrier with respect to structure **G1-[1]**;  $T_c$  = crossover temperature;  $^\ddagger$  = transition structure;  $k^{\text{Class}}$  = rate constant obtained from classical transition state theory (TST);  $k^{\text{Q-vib}}$  = rate constant obtained with quantized vibrations including the zero-point vibrational energy;  $k^{\text{S-Wig}}$  = rate constant obtained with quantized vibrations and tunneling correction through the simplified Wigner correction to the second order;  $\Delta H^\ddagger$  and  $\Delta G^\ddagger$  = enthalpy of activation and Gibbs free energy barrier with respect to structure **G1-[1]**.

**Table S9** Enthalpies ( $\Delta H^{\text{Rel}}$ ) and relative Gibbs free energies ( $\Delta G^{\text{Rel}}$ ) for direct covalent bond dissociations in the  $S_1$  state, obtained based on the transition state theory and barrierless potential energy curves ( $\Delta E^\ddagger = 0 \text{ kJ mol}^{-1}$ ). Energies and temperatures are in  $\text{kJ mol}^{-1}$  and K, respectively.

|                                                 | $\Delta E^{\text{Rel}}$ | $\Delta H^{\text{Rel}}$ | T    | $\Delta G^{\text{Rel}}$ |
|-------------------------------------------------|-------------------------|-------------------------|------|-------------------------|
|                                                 |                         |                         | 308  | -10                     |
| <b>E1-[1]* <math>\rightarrow</math> E1-[3]§</b> | -227                    | -3                      | 585  | -15                     |
|                                                 |                         |                         | 1200 | -30                     |
|                                                 |                         |                         | 308  | -127                    |
| <b>E2-[2]* <math>\rightarrow</math> E2-[3]§</b> | -168                    | -124                    | 585  | -130                    |
|                                                 |                         |                         | 1200 | -136                    |
|                                                 |                         |                         | 308  | -12                     |
| <b>E3-[2]* <math>\rightarrow</math> E3-[3]§</b> | -12                     | -9                      | 585  | -28                     |
|                                                 |                         |                         | 1200 | -63                     |

$\Delta E^{\text{Rel}}$  = relative energy with respect to the vertically excited structure; \* = vertically excited structure; § = structure at the intersection of the  $S_0$  and  $S_1$  potential energy curves;  $\Delta H^{\text{Rel}}$  and  $\Delta G^{\text{Rel}}$  = enthalpy and relative Gibbs free energy with respect to the vertically excited structure.

**Table S10** Enthalpies ( $\Delta H^{\text{Rel}}$ ) and relative Gibbs free energies ( $\Delta G^{\text{Rel}}$ ) for formations of  $\text{NH}_3\text{O}$ ,  $\text{HNO}$  and  $\text{H}_2$ , and the N-H.. $\text{H}_2\text{O}$  complex obtained from unimolecular isomerizations of dissociated structures in the  $S_0$  state,

computed based on transition state theory and barrierless potential energy curves ( $\Delta E^\ddagger = 0 \text{ kJ mol}^{-1}$ ). Energies and temperatures are in  $\text{kJ mol}^{-1}$  and K, respectively.

|                                    | $\Delta E^{\text{Rel}}$ | $\Delta H^{\text{Rel}}$ | T    | $\Delta G^{\text{Rel}}$ |
|------------------------------------|-------------------------|-------------------------|------|-------------------------|
|                                    |                         |                         | 308  | -215                    |
| <b>G5-[1]<sup>§</sup> → G5-[3]</b> | -241                    | -219                    | 585  | -212                    |
|                                    |                         |                         | 1200 | -205                    |
|                                    |                         |                         | 308  | -301                    |
| <b>G6-[1]<sup>§</sup> → G6-[3]</b> | -285                    | -279                    | 585  | -319                    |
|                                    |                         |                         | 1200 | -363                    |
|                                    |                         |                         | 308  | -154                    |
| <b>G7-[1] → G7-[3]</b>             | -180                    | -154                    | 585  | -152                    |
|                                    |                         |                         | 1200 | -152                    |

$\Delta E^{\text{Rel}}$  = relative energy with respect to the precursor;  $^{\text{§}}$  = structure at the intersection of the  $S_0$  and  $S_1$  potential energy curves;  $\Delta H^{\text{Rel}}$  and  $\Delta G^{\text{Rel}}$  = enthalpy and relative Gibbs free energy with respect to dissociated structure.

**Table S11** Rate constants (k), enthalpies ( $\Delta H$ ) and Gibbs free energies ( $\Delta G$ ) for formations of  $\text{NH}_3\text{O}$ ,  $\text{HNO}$  and  $\text{H}_2$ , and the  $\text{N-H}\cdots\text{H}_2\text{O}$  complex from unimolecular isomerizations of dissociated structures in the  $S_1$  state, obtained based on the transition state theory and potential energy curves. Energies, rate constants and temperatures are in  $\text{kJ mol}^{-1}$ ,  $\text{s}^{-1}$  and K, respectively.

|                                                | $\Delta E^\ddagger$ (Rel) | $\Delta H^\ddagger$ (Rel) | $T_c$ | <b>T</b> | $k^{\text{Class}}$    | $k^{\text{Q-vib}}$    | $k^{\text{S-Wig}}$    | $\Delta G^\ddagger$ (Rel) |
|------------------------------------------------|---------------------------|---------------------------|-------|----------|-----------------------|-----------------------|-----------------------|---------------------------|
|                                                |                           |                           |       | 308      | $7.98 \times 10^2$    | $2.40 \times 10^3$    | $1.04 \times 10^4$    | 56                        |
| <b>E5-[1] → E5-[2]<sup>‡</sup></b>             | 55                        | 52                        | 437   | 585      | $2.01 \times 10^7$    | $3.14 \times 10^7$    | $6.03 \times 10^7$    | 63                        |
|                                                |                           |                           |       | 1200     | $6.56 \times 10^9$    | $7.55 \times 10^9$    | $9.20 \times 10^9$    | 81                        |
|                                                |                           |                           |       | 308      |                       |                       |                       | (-9)                      |
| <b>E5-[2]<sup>‡</sup> → E5-[3]</b>             | (-41)                     | (-12)                     | -     | 585      | -                     | Barrierless potential | -                     | (-7)                      |
|                                                |                           |                           |       | 1200     |                       |                       |                       | (-1)                      |
|                                                |                           |                           |       | 308      | $6.38 \times 10^3$    | $5.04 \times 10^5$    | $1.42 \times 10^6$    | 42                        |
| <b>E6-[1]<sup>§</sup> → E6-[2]<sup>‡</sup></b> | 71                        | 57                        | 324   | 585      | $2.87 \times 10^9$    | $1.49 \times 10^{10}$ | $2.24 \times 10^{10}$ | 33                        |
|                                                |                           |                           |       | 1200     | $4.88 \times 10^{12}$ | $7.78 \times 10^{12}$ | $8.71 \times 10^{12}$ | 12                        |
|                                                |                           |                           |       | 308      |                       |                       |                       | (-234)                    |
| <b>E6-[2]<sup>‡</sup> → E6-[3]</b>             | (-221)                    | (-201)                    | -     | 585      | -                     | Barrierless potential | -                     | (-262)                    |
|                                                |                           |                           |       | 1200     |                       |                       |                       | (-328)                    |
|                                                |                           |                           |       | 308      |                       |                       |                       | (-254)                    |
| <b>E7-[1] → E7-[3]<sup>§</sup></b>             | (-249)                    | (-230)                    | -     | 585      | -                     | Barrierless potential | -                     | (-272)                    |
|                                                |                           |                           |       | 1200     |                       |                       |                       | (-319)                    |

$\Delta E^\ddagger$  and  $\Delta E^{\text{Rel}}$  = relative energies on the potential energy curve with respect to the precursor;  $T_c$  = crossover temperature; <sup>‡</sup> = transition structure; <sup>§</sup> = structure at the intersection of the  $S_0$  and  $S_1$  potential energy curves;  $k^{\text{Class}}$  = rate constant obtained from classical transition-state theory (TST);  $k^{\text{Q-vib}}$  = rate constant obtained with quantized vibrations including the zero-point vibrational energy;  $k^{\text{S-Wig}}$  = rate constant obtained with quantized vibrations and tunneling correction through the simplified Wigner correction to the second order;  $\Delta H^\ddagger$  and  $\Delta G^\ddagger$  = enthalpy and Gibbs free energy barrier with respect to the precursor;  $\Delta H^{\text{Rel}}$  and  $\Delta G^{\text{Rel}}$  = enthalpy and relative Gibbs free energy with respect to the transition structure; (...) = value obtained based on barrierless potential.

**Table S12** Vertical excitation wavelengths ( $\lambda$ ) and energies ( $E^{\text{Ex}}$ ) and corresponding normalized oscillator strengths with respect to structure **G1-[1]**.

| <b>Structure</b>          | <b><math>\lambda</math><br/>(nm)</b> | <b><math>E^{\text{Ex}}</math><br/>(eV)</b> | <b>Oscillator<br/>strength</b> |
|---------------------------|--------------------------------------|--------------------------------------------|--------------------------------|
| <b>G1-[1]</b>             | 194                                  | 6.38                                       | 1.00                           |
| <b>G2-[2]<sup>†</sup></b> | 435                                  | 2.85                                       | 0.007                          |
| <b>G3-[2]<sup>†</sup></b> | 530                                  | 2.34                                       | 0.010                          |
| <b>G4-[2]<sup>†</sup></b> | 646                                  | 1.92                                       | 0.010                          |
